# Supplementary material
Source: PubMed Central journal article supplement (PMC7934204)
Supplement: NIHMS1669278-supplement-Supplementary_material.pdf [file NIHMS1669278-supplement-Supplementary_material.pdf]

## Supplementary Information for:

### Interaction with single-stranded DNA-binding protein localizes ribonuclease HI to DNA replication forks and facilitates R-loop removal

**Table S1.** *Escherichia coli* K-12 strains in this study

**Figure S1.** Estimation of copy number per cell and proportion DNA-bound molecules

**Figure S2.** Growth curves of wild-type, *rnhA* and *rep* *E. coli* mutants

**Figure S3.** Complex formation with SSB is not required for suppression of cSDR by RNase HI

**Figure S4.** The loss of RNase HI localization does not affect RNase HI activity in DNA polymerase I-dependent pathways

**Figure S5.** Plating efficiency of *uvrD*, *recG*, or *recBCD* mutants with or without *rnhAK60E* on minimal or rich media

**Figure S6.** Plating efficiency of *rpoB* mutants with or without *rnhAK60E* or *rep::kan* on minimal or rich media

**Supplementary References**

**Table S1. *Escherichia coli* K-12 strains in this study**

| Strain                              | Relevant Genotype                                                             | Source                                                           |
|-------------------------------------|-------------------------------------------------------------------------------|------------------------------------------------------------------|
| AB1157 and derivatives <sup>a</sup> |                                                                               | (Boyce & Howard-Flanders, 2003)                                  |
| JC13509                             | <i>sulB103 lacMS286 Φ80dIIIacBK1 argE3 his-4 thi-1 xyl-5 mtl-1 rpsL31 tsx</i> | (Sandler et al., 2001)                                           |
| SS9364                              | <i>rep::kan</i>                                                               | (Sandler, 2005)                                                  |
| SS9180                              | <i>rnhA::cat ilv-500::Tn10</i>                                                | S. Sandler                                                       |
| SS10062                             | <i>ilv-500::Tn10</i>                                                          | S. Sandler                                                       |
| SS10032                             | <i>rnhA::cat del(proA)kan</i>                                                 | S. Sandler                                                       |
| SS6046                              | <i>recBCD::cat</i>                                                            | (Long, Massoni, & Sandler, 2010)                                 |
| SS7329                              | <i>recB270(ts) recC271(ts) del(attB)::sulA-gfp</i>                            | S. Sandler                                                       |
| SS1651                              | <i>rnhA339::cat sulA-gfp</i>                                                  | (Sandler, 2005)                                                  |
| AL0454                              | <i>dnaA46(ts) tnaA300::Tn10</i>                                               | (Hinds & Sandler, 2004)                                          |
| SS10072                             | <i>rnhA::cat dnaA46(ts)</i>                                                   | S. Sandler                                                       |
| CP54                                | <i>rnhAK60E, cat</i>                                                          | P1 BW25113 with <i>rnhAK60E-cat</i> x JC13509 to Cm <sup>r</sup> |
| CP58                                | <i>rnhAK60E, FLP scar</i>                                                     | CP54 with CAT removed                                            |
| CP60                                | <i>rnhAK60E, cat ilv-500::Tn10</i>                                            | P1.SS10062 x CP54 to Tc <sup>r</sup>                             |

|      |                                                       |                                                                               |
|------|-------------------------------------------------------|-------------------------------------------------------------------------------|
| CP62 | <i>rnhAK60E, FLP scar proA::kan</i>                   | P1.SS10032 x CP58 to<br>Kan <sup>r</sup>                                      |
| CP63 | <i>rnhA<sup>+</sup>, cat</i>                          | P1 BW25113 with <i>rnhA<sup>+</sup>-<br/>cat</i> x JC13509 to Cm <sup>r</sup> |
| CP64 | <i>recG(kan ins)</i>                                  | P1.EAW9 x JC13509 to<br>Kan <sup>r</sup>                                      |
| CP65 | <i>rnhA<sup>+</sup>, FLP scar</i>                     | CP63 with CAT removed                                                         |
| CP70 | <i>rnhA<sup>+</sup>, cat ilv-500::Tn10</i>            | P1.SS10062 x CP63 to Tc <sup>r</sup>                                          |
| CP71 | <i>dnaA46(ts) tnaA300::Tn10 rnhA<sup>+</sup>, cat</i> | P1. AL0454 x CP63 to Tc <sup>r</sup><br>and Ts                                |
| CP79 | <i>recG(kan ins) zic-4901::Tn10</i>                   | P1.CAG18492 x CP64                                                            |
| CP84 | <i>rep::kan rnhA<sup>+</sup>, FLP scar</i>            | P1.SS9364 x CP65 to<br>Kan <sup>r</sup>                                       |
| CP86 | <i>rnhAK60E, FLP scar rep::kan</i>                    | P1. SS9364 x CP58 to<br>Kan <sup>r</sup>                                      |
| CP88 | <i>uvrD::kan</i>                                      | P1. JDW1528 x CP65                                                            |
| CP89 | <i>rnhAK60E, FLP scar uvrD::kan</i>                   | P1. JDW1528 x CP58 to<br>Kan <sup>r</sup>                                     |
| CP90 | <i>rnhAK60E, FLP scar recG::kan</i>                   | P1. EAW506 x CP58 to<br>Kan <sup>r</sup>                                      |
| CP95 | <i>uvrD::kan fadAB101::Tn10</i>                       | P1. CAG18496 x<br>JDW1528 to Tc <sup>r</sup>                                  |
| CP96 | <i>dinG::kan zbi-29::Tn10</i>                         | P1.CAG18493 x JW0784-                                                         |

|        |                                                            | 1                                          |
|--------|------------------------------------------------------------|--------------------------------------------|
| CP119  | <i>rnhAK60E, FLP scar rpoB2 rep::kan btuB::Tn10</i>        | P1 JDW761 x CP86 to Rif <sup>r</sup>       |
| CP124  | <i>rnhAK60E, FLP scar rep::kan rpoB8 btuB::Tn10</i>        | P1. JDW756 x CP86                          |
| CP126  | <i>rnhAK60E, FLP scar rep::kan pEAW903</i>                 | CP86 + pEAW903                             |
| CP127  | <i>rnhA<sup>+</sup>, FLP scar pEAW903</i>                  | CP65 + pEAW903                             |
| CP128  | <i>rnhAK60E, FLP scar pEAW903</i>                          | CP58+ pEAW903                              |
| CP129  | <i>rep::kan pEAW903</i>                                    | CP84 + pEAW903                             |
| CP130  | <i>rnhA<sup>+</sup>, FLP scar rpoB8 (Q513P) btuB::Tn10</i> | P1. JDW756 x CP65                          |
| CP131  | <i>rnhA<sup>+</sup>, FLP scar rpoB2 (H526Y) btuB::Tn10</i> | P1. JDW761 x CP65                          |
| CP140  | <i>rep::kan rpoB8 (Q513P) btuB::Tn10</i>                   | P1. JDW756 x CP84                          |
| CP141  | <i>rep::kan rpoB2 (H526Y) btuB::Tn10</i>                   | P1. JDW761 x CP84                          |
| CP142  | <i>rnhAK60E, FLP scar rpoB2 (H526Y) btuB::Tn10</i>         | P1. JDW761 x CP58                          |
| CP143  | <i>rnhAK60E, FLP scar rpoB8 (Q513P) btuB::Tn10</i>         | P1. JDW756 x CP58                          |
| CP154  | <i>rnhA::cat</i>                                           | P1.SS10032 x JC13509 to<br>Cm <sup>r</sup> |
| CP165  | <i>rnhA::cat zae502::Tn10</i>                              | P1.CAG18436 x CP154 to<br>Tc <sup>r</sup>  |
| CP176  | <i>rnhA<sup>+</sup>, FLP scar polA12(ts)</i>               | P1. CP63 x MM386                           |
| CP178  | <i>rnhAK60E, FLP scar polA12(ts)</i>                       | P1. CP54 x MM386                           |
| CP179  | <i>rnhA::cat polA12(ts)</i>                                | P1. SS1651 x MM386                         |
| CP206  | <i>rnhAK60E, FLP scar recBCD::cat</i>                      | P1. SS6046 x CP58                          |
| RRL327 | <i>rnhA-yet-kan</i>                                        | This study                                 |

|        |                                       |                     |
|--------|---------------------------------------|---------------------|
| RRL355 | <i>Kan-mcherry-dnaN</i>               | This study          |
| RRL388 | <i>frt-mcherry-dnaN</i>               | This study          |
| VV05   | <i>dnaQ-mNeonGreen-kan</i>            | This study          |
| VV08   | <i>rnhAK60E-ypet-kan</i>              | This study          |
| VV11   | <i>frt-mcherry-dnaN rnhA-ypet-kan</i> | P1. RRL388 x RRL327 |
| VV14   | <i>rnhA-mNeonGreen-kan</i>            | This study          |

#### Other strains used as P1 donors

|          |                                 |                  |
|----------|---------------------------------|------------------|
| CAG18436 | <i>uvrD::kan</i>                | (MG1655 deriv. ) |
| CAG18492 | <i>zic-4901::Tn10</i>           | (MG1655 deriv. ) |
| EAW9     | <i>recG(del)::kan</i>           | (MG1655 deriv. ) |
| CAG18496 | <i>fadAB101::Tn10</i>           | (MG1655 deriv. ) |
| CAG18493 | <i>zbi-29::Tn10</i>             | (MG1655 deriv. ) |
| JDW756   | <i>rpoB8 (Q513P) btuB::Tn10</i> | (MG1655 deriv. ) |
| JDW761   | <i>rpoB2 (H526Y) btuB::Tn10</i> | (MG1655 deriv. ) |
| JDW1528  | <i>uvrD::kan</i>                | (MG1655 deriv. ) |
| EAW506   | <i>recG::kan</i>                | (MG1655 deriv. ) |

#### Other derivatives

|       |                                                                                 |                                            |
|-------|---------------------------------------------------------------------------------|--------------------------------------------|
| MM386 | <i>lacZ53(Am), lambda-, relA1, rpsL151 (strR),<br/>polA12(ts), rha-5, deoC2</i> | W3110 derivative (Monk &<br>Kinross, 1972) |
|-------|---------------------------------------------------------------------------------|--------------------------------------------|

<sup>a</sup>Only the relevant genotype is shown

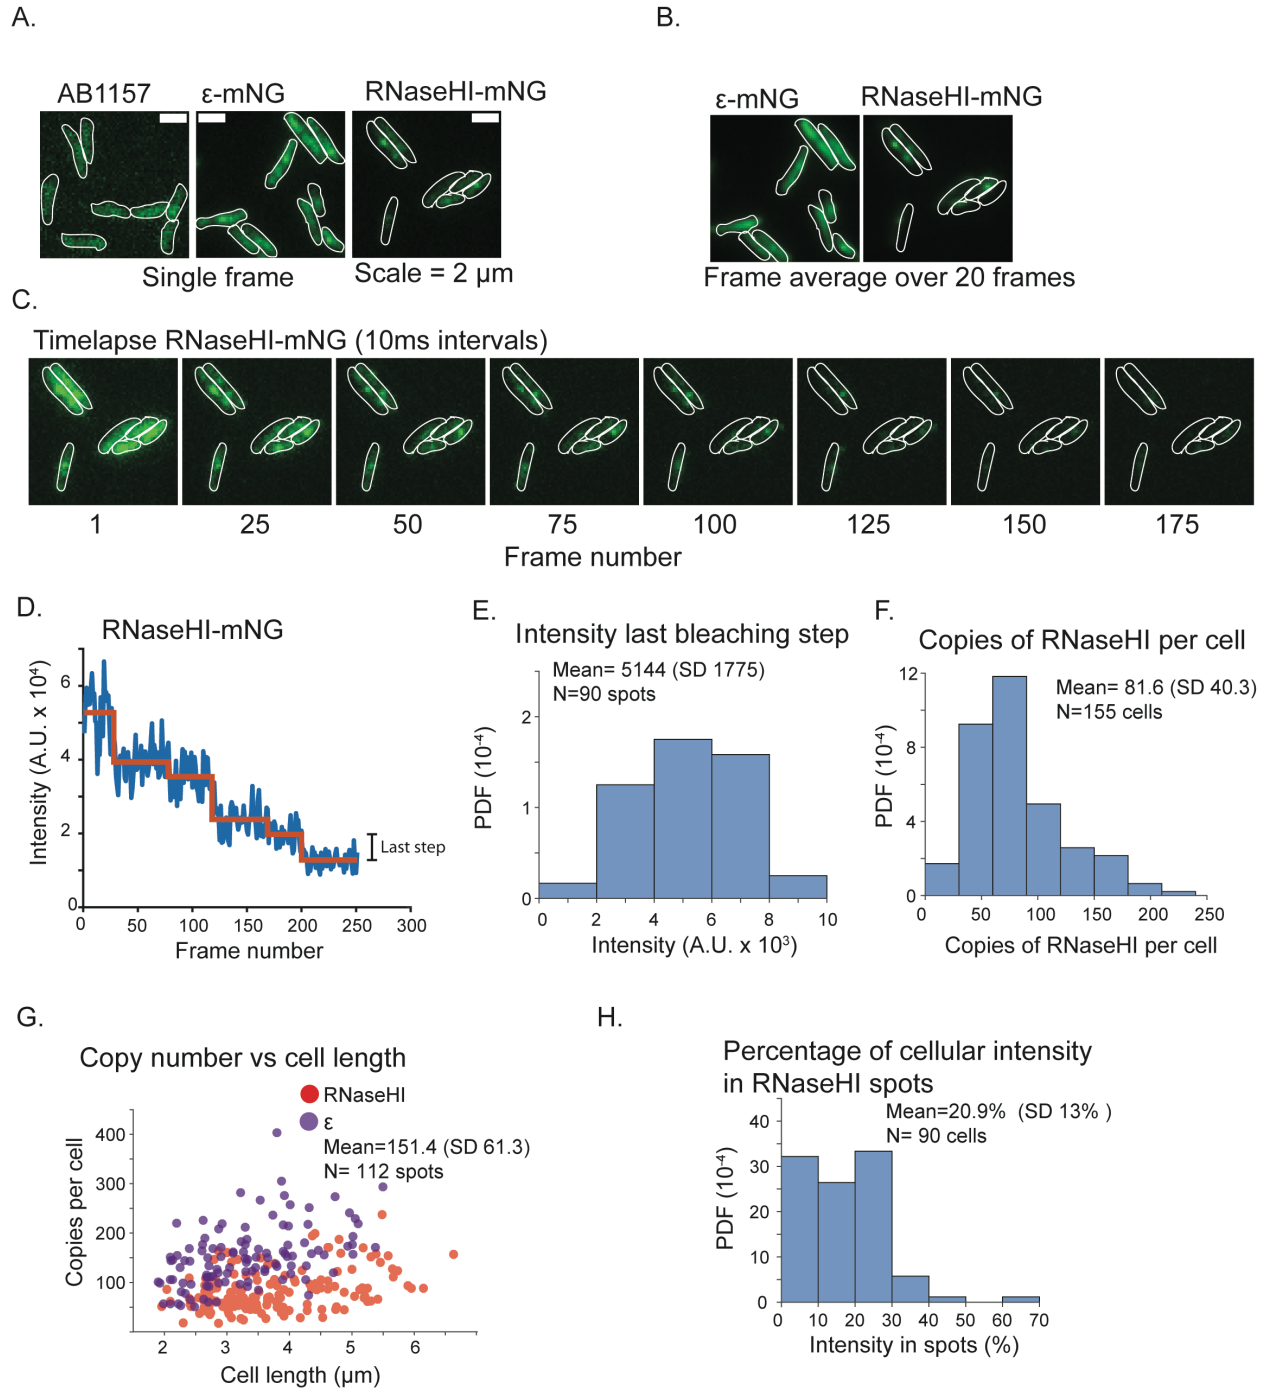

**Figure S1. Estimation of copy number per cell and proportion DNA-bound molecules. (A)** Representative pictures of AB1157, used as a control to estimate background endogenous fluorescence, and of cells carrying  $\epsilon$  (the proofreading exonuclease subunit of DNA Pol III) and RNase HI fused to mNeonGreen. Camera integration time was of 10 milliseconds. **(B)** Frame

average of 20 pictures. **(C)** Example images of cells followed over 175 frames showing bleaching of fluorescence over time. **(D)** Example of the time-intensity profile of a single spot of RNase HI where a stepwise decrease of fluorescence can be observed. We used the difference in intensity in the last step as a measure of the intensity produced by a single molecule in our system. Note that the initial intensity, and the observation of multiple steps in the trace, are indicative of multiple copies of RNase HI being present in this spot. **(E)** Distribution of the intensities of the last bleaching step for a population of spots. **(F)** Estimation of the copy number of RNase HI per cell obtained by dividing the integrated intensity of individual cells by our estimated intensity of a single molecule. **(G)** The relation between the estimated copy number and cell length is shown for RNase HI and for the DNA Pol III subunit  $\epsilon$ . As expected, the copy number increases with cell length. Also, our estimate supports a higher copy number for  $\epsilon$  compared to RNase HI, although this estimate is lower than a previously reported estimate of 270 copies (SD 160) (Reyes-Lamothe et al., 2010). **(E)** Estimation of the fraction of RNase HI copies that is bound to DNA obtained by dividing the summed intensity found in spots by the total intensity for individual cells.

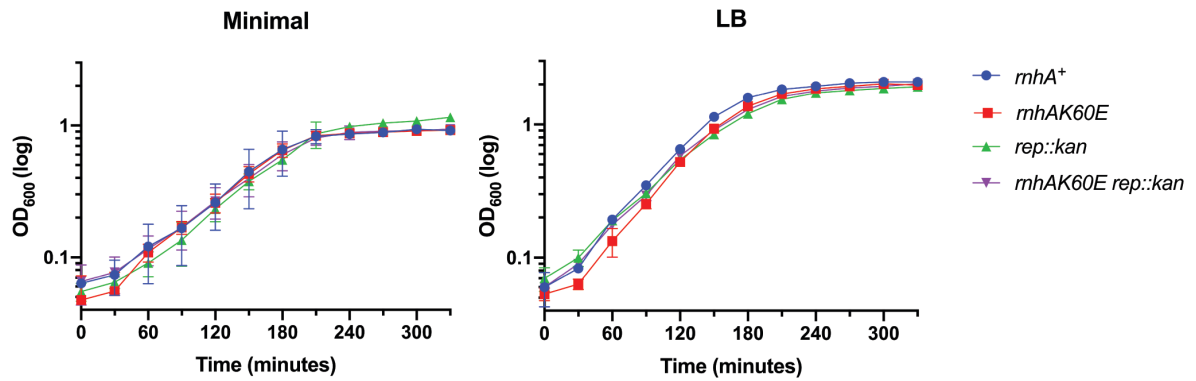

**Figure S2. Growth curves of wild-type, *rnhA* and *rep* *E. coli* mutants.** The OD<sub>600</sub> time points of cultures grown in minimal (left) or LB (right) media shaking at 37°C. The growth curves were performed in triplicate for each strain and inoculated from different overnight cultures. The points represent the mean optical density at each time point and the error bars depict the standard deviation.



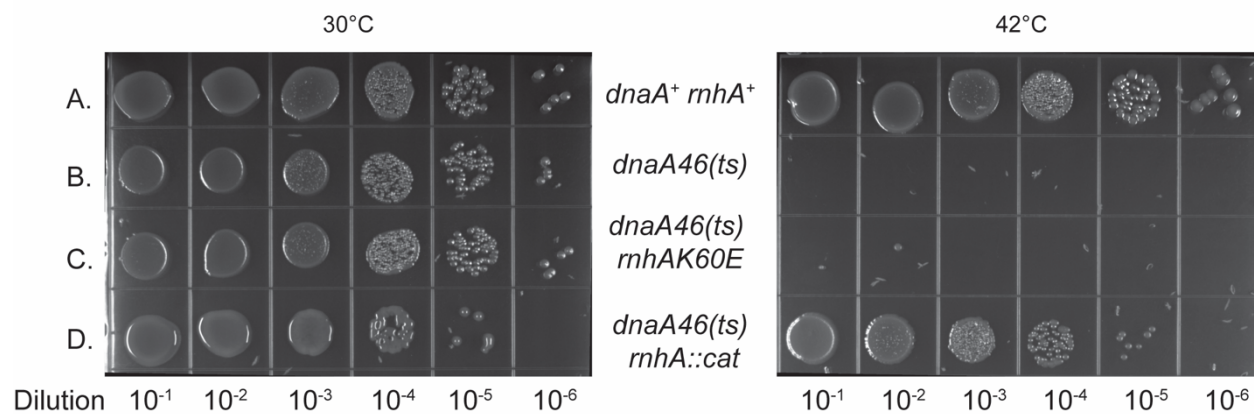

**Figure S3. Complex formation with SSB is not required for suppression of cSDR by RNase HI.** Dilutions of overnight cultures grown in minimal medium (56/2) and plated on minimal medium. Plates were incubated at 30°C (left) or 42°C (right) for 36 hours or 24 hours, respectively. The images are the representative of a plating experiment performed in triplicate.

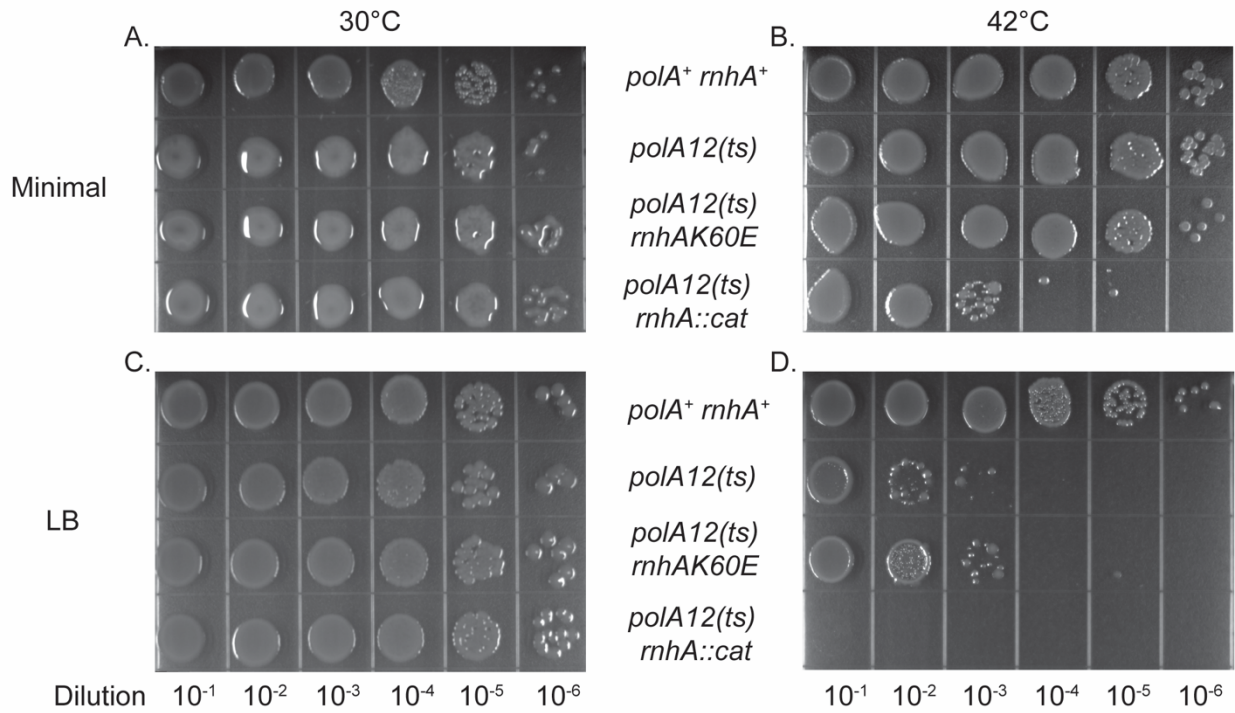

**Figure S4. The loss of RNase HI localization does not affect RNase HI activity in DNA polymerase I-dependent pathways.** Dilutions of overnight cultures grown in minimal medium (56/2) and plated on minimal medium (top, A and B) or LB (bottom, C and D). The plates were incubated at 30°C (left, A and C) or 42°C (right, B and D) for 36 hours or 24 hours, respectively. The images are the representative of a plating experiment performed in triplicate.

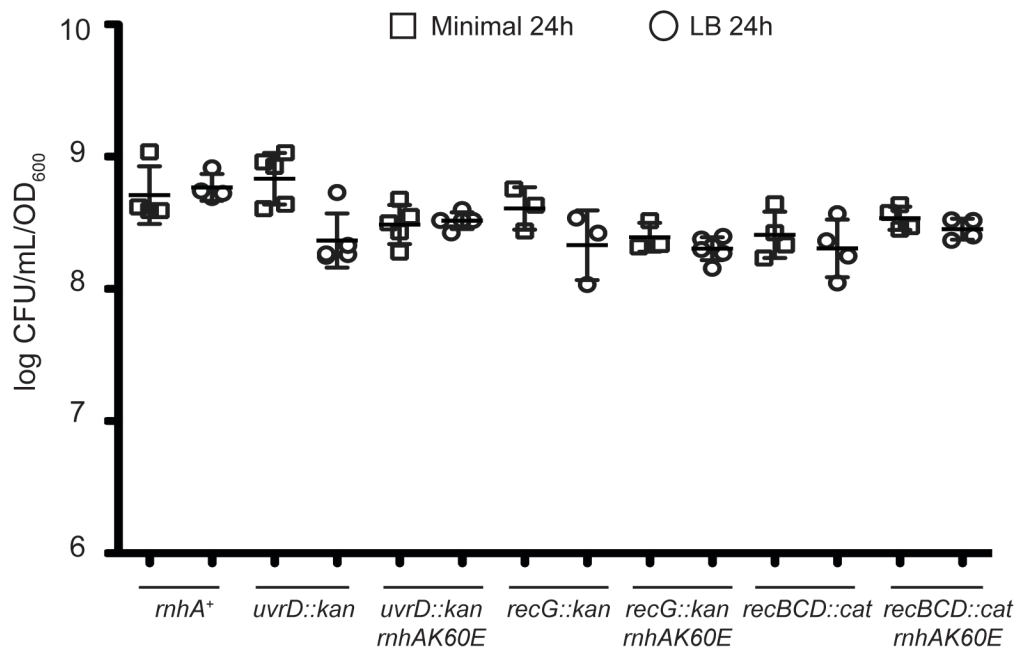

**Figure S5. Plating efficiency of *uvrD*, *recG*, or *recBCD* mutants with or without *rnhAK60E* on minimal or rich media.** The CFU/mL of each strain (normalized to OD<sub>600</sub>) is plotted from overnight cultures diluted and plated on minimal (squares) or LB (circles) media. Colonies were quantitated after growth at 37°C for 24hrs. Each symbol is a single culture and the mean CFU/mL for each strain is represented by a black line. Error bars indicate the standard deviation.

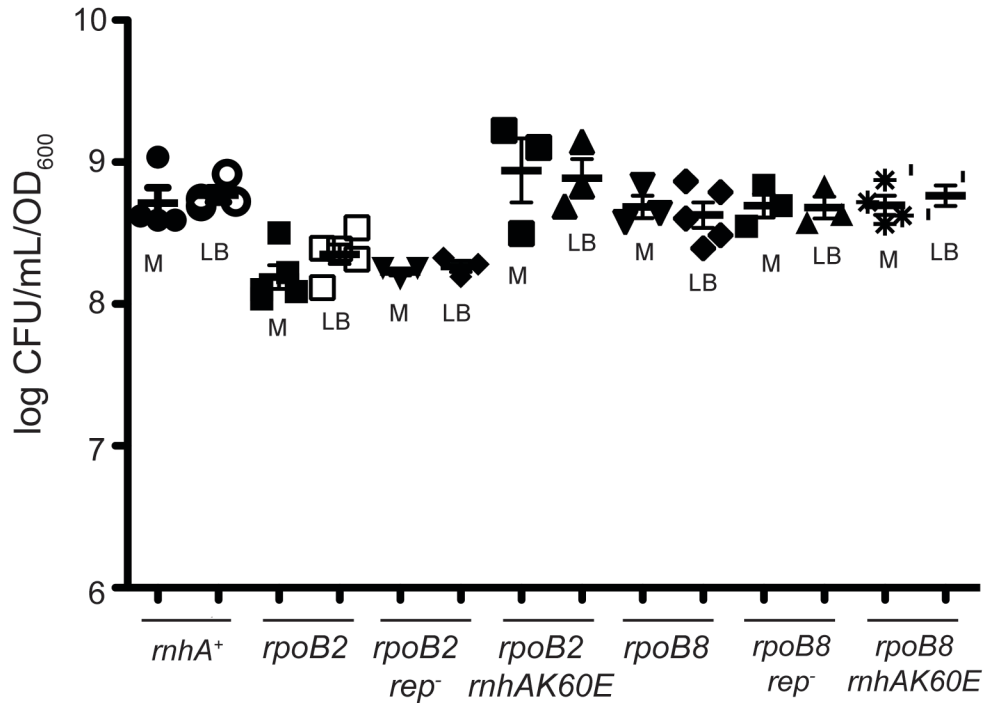

**Figure S6. Plating efficiency of *rpoB* mutants with or without *rnhAK60E* or *rep::kan* on minimal or rich media.** The CFU/mL of each strain (normalized to OD<sub>600</sub>) is plotted from overnight cultures diluted and plated on minimal (M) or LB media. Plates were incubated at 37°C for 24 hours unless otherwise noted. Each symbol is a single culture and the mean CFU/mL for each strain is represented by a black line. The error bars indicate the standard deviation.

### Supplementary References:

- Boyce, R. P., & Howard-Flanders, P. (2003). Release of ultraviolet light-induced thymine dimers from DNA in *E. coli* K-12. 1964. *DNA Repair*, 2(1927), 1280–1287.
- Hinds, T., & Sandler, S. J. (2004). Allele specific synthetic lethality between *priC* and *dnaAts* alleles at the permissive temperature of 30°C in *E. coli* K-12. *BMC Microbiology*, 4.
- Long, J. E., Massoni, S. C., & Sandler, S. J. (2010). *RecA4142* causes SOS constitutive expression by loading onto reversed replication forks in *Escherichia coli* K-12. *Journal of Bacteriology*, 192(10), 2575–2582.
- Monk, M., & Kinross, J. (1972). Conditional lethality of *recA* and *recB* derivatives of a strain of *Escherichia coli* K-12 with a temperature-sensitive deoxyribonucleic acid polymerase I. *J. Bacteriol.*, 109234, 971–978.
- Reyes-Lamothe, R., Sherratt, D. J., & Leake, M. C. (2010). Stoichiometry and architecture of active DNA replication machinery in *Escherichia coli*. *Science*, 328(5977), 498–501.
- Sandler, Steven J., McCool, J. D., Do, T. T., & Johansen, R. U. (2001). *PriA* mutations that affect *PriA-PriC* function during replication restart. *Molecular Microbiology*, 41(3), 697–704.
- Sandler, S J. (2005). Requirements for replication restart proteins during constitutive stable DNA replication in *Escherichia coli* K-12. *Genetics*, 169(4), 1799–1806.
